# Supplementary material
Source: PubMed Central journal article supplement (PMC3824177)
Supplement: jcbfm2013127x1.pdf [file jcbfm2013127x1.pdf]

## Supplementary Information

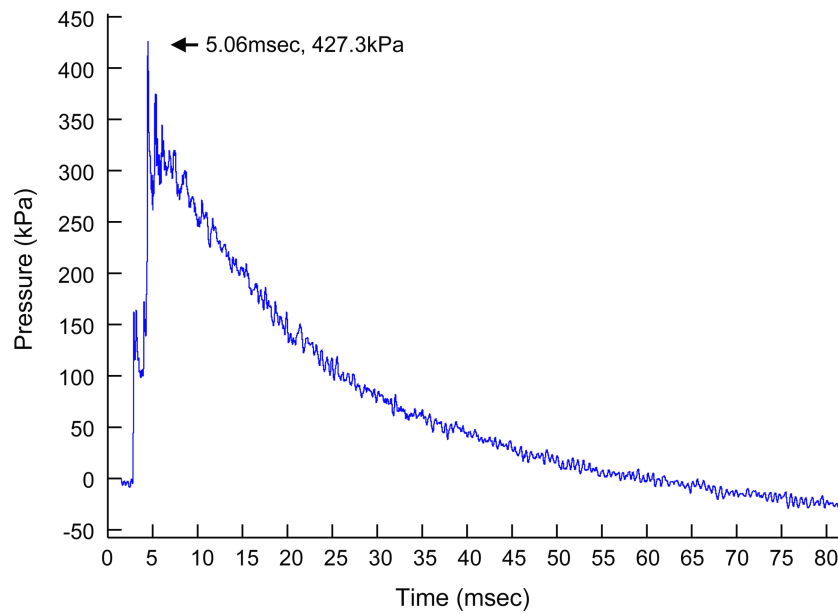

**Supplementary Fig 1** A friedlander pressure-time history for a compression-driven blast recorded by the pressure sensor. The peak positive impulse was 427.3kPa and the positive phase duration was 57.44ms.

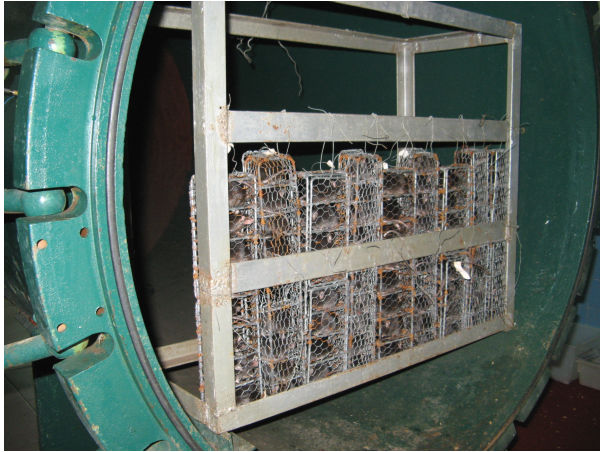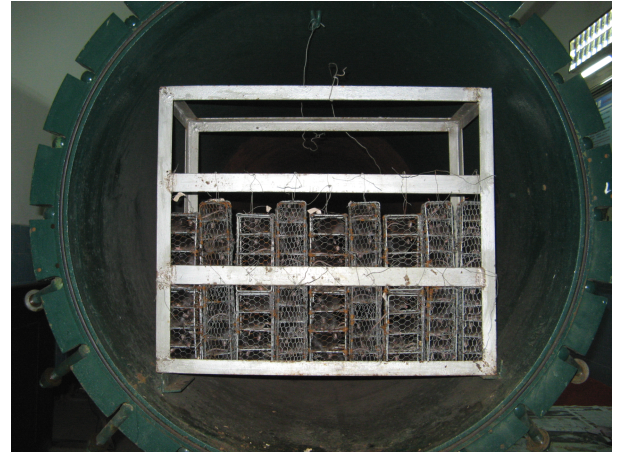

**Supplementary Fig 2** Photo illustrating the BST-I apparatus and the position of the cage-array in the same vertical plane to ensure equal exposure to WBBI for all mice.

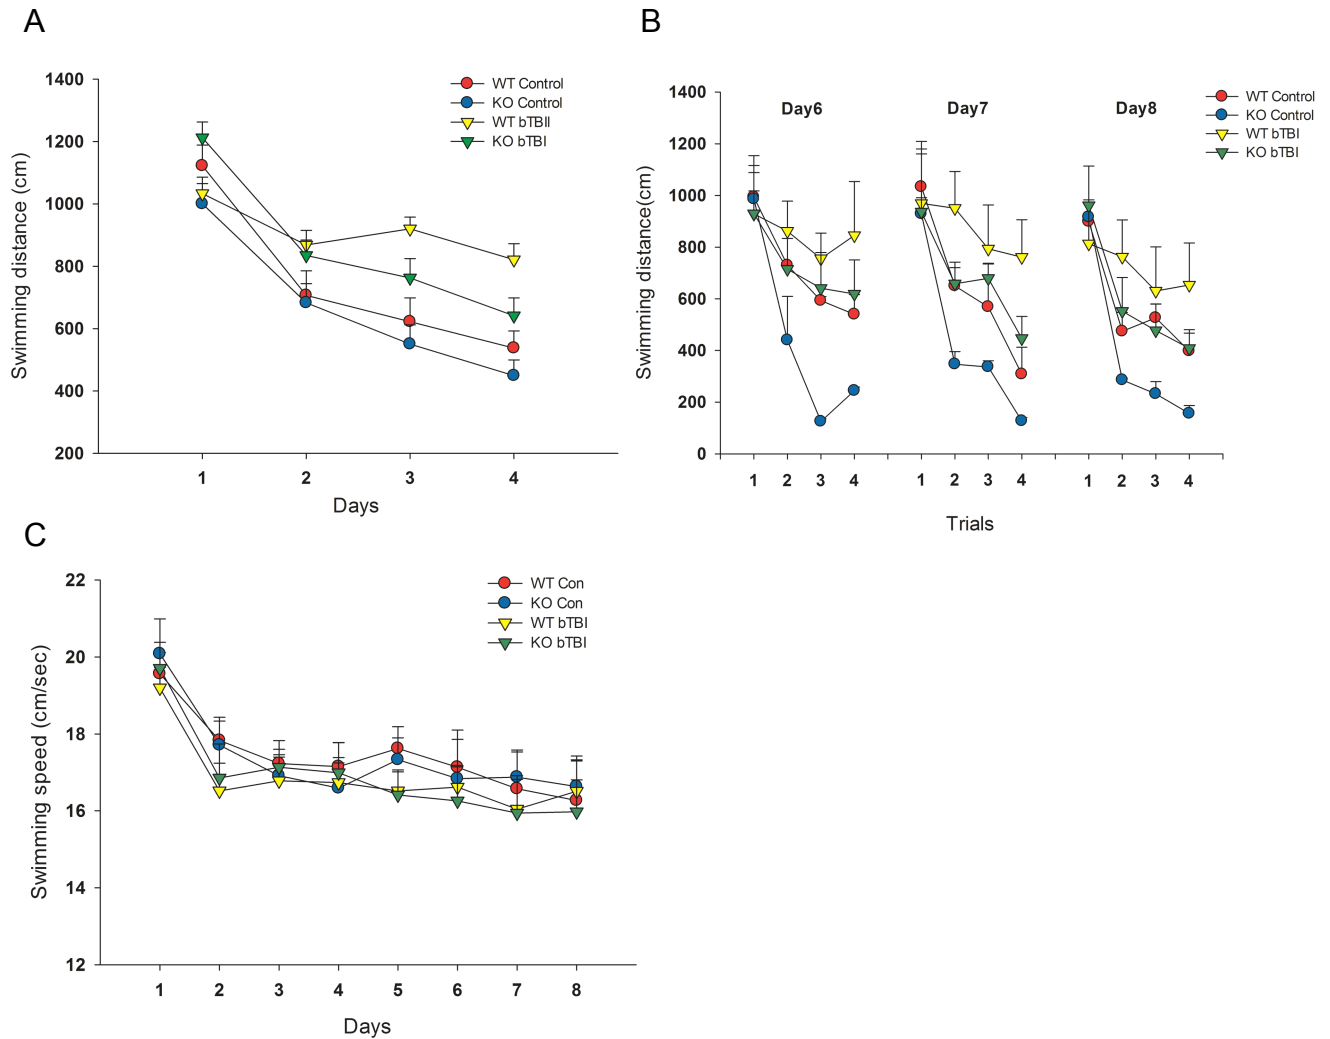

**Supplementary Fig 3** Swimming distance and speed during MWM test at 1w post-bTBI. **A.**

There was no significant difference day×genotype interaction' effects on the distance traveled to reach the platform between WT-control and KO-control groups ( $F(2, 345)=0.534, p=0.659$ , two-way ANOVA), while there were significant difference between four groups ( $F(8, 694)=5.524, p<0.001$ , two-way ANOVA) and between WT-bTBI and KO-bTBI mice ( $F(2, 348)=4.823, p<0.001$ , two-way ANOVA), indicating that reference memory was impaired after bTBI and that KO-bTBI mice exhibited alleviated reference memory impairment compared to WT-bTBI mice. **B.** Swimming distance reached the platform in each of the four consecutive trials per day during MWM working memory test. **C.** Swimming speed did not differ between groups, indicating no difference in gross spontaneous activity (Data are expressed as mean±SEM.  $n=12$  for each WT group and  $n=10$  for each KO group per test period).

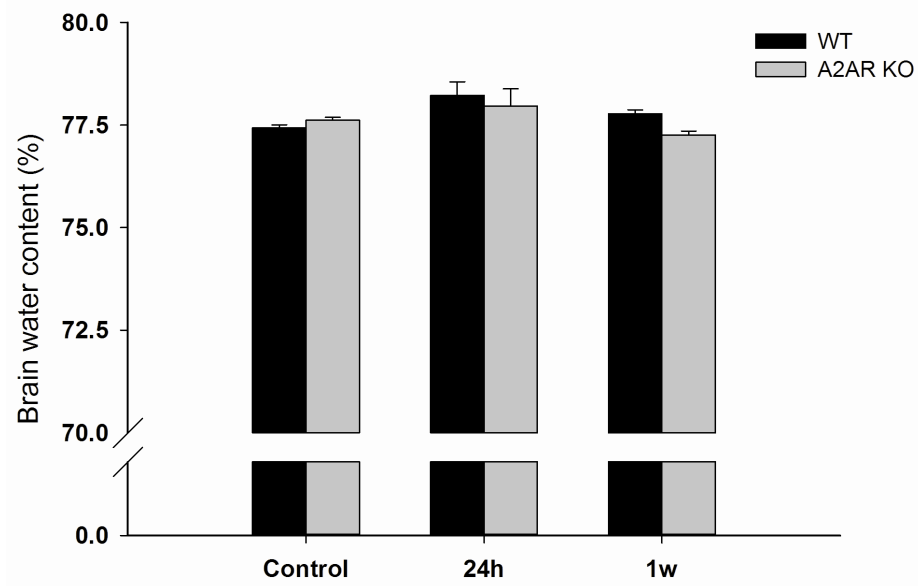

**Supplementary Fig 4** Brain water content was measured by a wet-dry method. There were no significant differences between Control and bTBI groups and between WT-bTBI and KO-bTBI groups.
